# Supplementary material
Source: publisher site journal article supplement (https://www.dovepress.com/get_supplementary_file.php?f=502644.docx)
Supplement: Supplementary file 1 [file get_supplementary_file.php]

**Supplemental Table 1 Characteristics of 49 patients with AML.**

| **Characteristics** | **Total (N = 49)** | | |
| --- | --- | --- | --- |
| **N** | **Median(range)** | **%** |
| Age |  | 62(29-89) |  |
| Sex |  |  |  |
| Male | 24 |  | 49 |
| Female | 25 |  | 51 |
| FAB classification |  |  |  |
| M0 | 2 |  | 4.1 |
| M1 | 3 |  | 6.1 |
| M2 | 32 |  | 65.3 |
| M4 | 4 |  | 8.2 |
| M5 | 8 |  | 16.3 |
| *Cytogenetic risk stratification |  |  |  |
| Favorable | 3 |  | 6.1 |
| Medium risk | 32 |  | 65.3 |
| High risk | 14 |  | 28.6 |
| *Molecular genetic risk stratification |  |  |  |
| Favorable | 7 |  | 14.3 |
| Medium risk | 22 |  | 44.9 |
| High risk | 20 |  | 40.8 |
| Relapse |  |  |  |
| Yes | 8 |  | 16.3 |
| No | 41 |  | 83.7 |
| Survival status |  |  |  |
| Alive | 21 |  | 42.9 |
| Dead | 28 |  | 57.1 |

FAB, France America and Britain. *Chinese guidelines for diagnosis and treatment of adult acute myeloid leukemia (not APL) (2023)
